#### **AUTHOR CORRECTION**

For the letter by Frölich in the October 2001 issue (ANESTHESIOLOGY 2001; 95:1044), the author's last name should have been spelled Frölich, not Froelich.
